# Supplementary material for: Effect of age, sex, and county on postmortem findings in goats and sheep in Tennessee (USA), 2017–2021
Source: PubMed Central journal article supplement (PMC11642948; doi:10.1371/journal.pone.0315680), 2024-12-13
Supplement: pone.0315680.s001.pdf [file pone.0315680.s001.pdf]

**S1 Table.**

| Primary Diagnoses in Goats |           |         |                      |                    |
|----------------------------|-----------|---------|----------------------|--------------------|
| Diagnosis                  | Frequency | Percent | Cumulative Frequency | Cumulative Percent |
| Endoparasitism             | 497       | 39.98   | 497                  | 39.98              |
| Abortion                   | 133       | 10.70   | 630                  | 50.68              |
| Neurologic disease         | 111       | 8.93    | 741                  | 59.61              |
| No diagnosis               | 90        | 7.24    | 831                  | 66.85              |
| Pneumonia                  | 83        | 6.68    | 914                  | 73.53              |
| Intestinal                 | 49        | 3.94    | 963                  | 77.47              |
| Urolithiasis               | 30        | 2.41    | 993                  | 79.89              |
| Trauma                     | 19        | 1.53    | 1012                 | 81.42              |
| Emaciation                 | 14        | 1.13    | 1026                 | 82.54              |
| Forestomach                | 14        | 1.13    | 1040                 | 83.67              |
| Anemia                     | 10        | 0.80    | 1050                 | 84.47              |
| Caseous lymphadenitis      | 10        | 0.80    | 1060                 | 85.28              |
| Sepsis                     | 10        | 0.80    | 1070                 | 86.08              |
| Metritis                   | 8         | 0.64    | 1078                 | 86.73              |
| Thymoma                    | 8         | 0.64    | 1086                 | 87.37              |
| dystocia                   | 8         | 0.64    | 1094                 | 88.01              |
| Heart failure              | 7         | 0.56    | 1101                 | 88.58              |
| Hepatic necrosis           | 7         | 0.56    | 1108                 | 89.14              |
| Pregnancy toxemia          | 7         | 0.56    | 1115                 | 89.70              |
| Copper toxicity            | 6         | 0.48    | 1121                 | 90.19              |
| Dystocia                   | 6         | 0.48    | 1127                 | 90.67              |
| Mastitis                   | 6         | 0.48    | 1133                 | 91.15              |
| Copper deficiency          | 5         | 0.40    | 1138                 | 91.55              |
| Peritonitis                | 5         | 0.40    | 1143                 | 91.95              |
| Hepatitis                  | 4         | 0.32    | 1147                 | 92.28              |
| Kidney disease             | 4         | 0.32    | 1151                 | 92.60              |

| Primary Diagnoses in Goats |           |         |                      |                    |
|----------------------------|-----------|---------|----------------------|--------------------|
| Diagnosis                  | Frequency | Percent | Cumulative Frequency | Cumulative Percent |
| Bladder                    | 3         | 0.24    | 1154                 | 92.84              |
| CAEV                       | 3         | 0.24    | 1157                 | 93.08              |
| DJD                        | 3         | 0.24    | 1160                 | 93.32              |
| Hepatic lipidosis          | 3         | 0.24    | 1163                 | 93.56              |
| Iron toxicity              | 3         | 0.24    | 1166                 | 93.81              |
| Polyarthritis              | 3         | 0.24    | 1169                 | 94.05              |
| Pulmonary edema            | 3         | 0.24    | 1172                 | 94.29              |
| Tetanus                    | 3         | 0.24    | 1175                 | 94.53              |
| Abomasal disease           | 2         | 0.16    | 1177                 | 94.69              |
| BVDV                       | 2         | 0.16    | 1179                 | 94.85              |
| Dermatitis                 | 2         | 0.16    | 1181                 | 95.01              |
| Hemangiosarcoma            | 2         | 0.16    | 1183                 | 95.17              |
| Hepatocellular necrosis    | 2         | 0.16    | 1185                 | 95.33              |
| Lymphoma                   | 2         | 0.16    | 1187                 | 95.49              |
| Omphalitis                 | 2         | 0.16    | 1189                 | 95.66              |
| Pregnancy toxemia          | 2         | 0.16    | 1191                 | 95.82              |
| Pulmonary dysmaturity      | 2         | 0.16    | 1193                 | 95.98              |
| Squamous cell carcinoma    | 2         | 0.16    | 1195                 | 96.14              |
| Uterine leiomyosarcoma     | 2         | 0.16    | 1197                 | 96.30              |
| Bladder perforation        | 1         | 0.08    | 1198                 | 96.38              |
| Cholecystitis              | 1         | 0.08    | 1199                 | 96.46              |
| Dehydration                | 1         | 0.08    | 1200                 | 96.54              |
| Esophageal disease         | 1         | 0.08    | 1201                 | 96.62              |
| Facial cellulitis          | 1         | 0.08    | 1202                 | 96.70              |
| Forestomach disease        | 1         | 0.08    | 1203                 | 96.78              |
| Goiter                     | 1         | 0.08    | 1204                 | 96.86              |
| Grayanotoxin               | 1         | 0.08    | 1205                 | 96.94              |

| Primary Diagnoses in Goats |           |         |                      |                    |
|----------------------------|-----------|---------|----------------------|--------------------|
| Diagnosis                  | Frequency | Percent | Cumulative Frequency | Cumulative Percent |
| Hepatic abscesses          | 1         | 0.08    | 1206                 | 97.02              |
| Hypocalcemia               | 1         | 0.08    | 1207                 | 97.10              |
| Injection reaction         | 1         | 0.08    | 1208                 | 97.18              |
| Keratitis                  | 1         | 0.08    | 1209                 | 97.26              |
| Laminitis                  | 1         | 0.08    | 1210                 | 97.35              |
| Lymphnodal abscesses       | 1         | 0.08    | 1211                 | 97.43              |
| Mammary sarcoma            | 1         | 0.08    | 1212                 | 97.51              |
| Melanoma                   | 1         | 0.08    | 1213                 | 97.59              |
| Mesentery                  | 1         | 0.08    | 1214                 | 97.67              |
| Muscle atrophy             | 1         | 0.08    | 1215                 | 97.75              |
| Myositis                   | 1         | 0.08    | 1216                 | 97.83              |
| Nephrotoxicosis            | 1         | 0.08    | 1217                 | 97.91              |
| Oral disease               | 1         | 0.08    | 1218                 | 97.99              |
| Osteomyelitis              | 1         | 0.08    | 1219                 | 98.07              |
| Osteoporosis               | 1         | 0.08    | 1220                 | 98.15              |
| Otitis media               | 1         | 0.08    | 1221                 | 98.23              |
| Pneumonia                  | 1         | 0.08    | 1222                 | 98.31              |
| Portal vein hypoperfusion  | 1         | 0.08    | 1223                 | 98.39              |
| Pulmonary abscess          | 1         | 0.08    | 1224                 | 98.47              |
| Pulmonary hemorrhage       | 1         | 0.08    | 1225                 | 98.55              |
| Pyelonephritis             | 1         | 0.08    | 1226                 | 98.63              |
| Renal dysplasia            | 1         | 0.08    | 1227                 | 98.71              |
| Renal failure              | 1         | 0.08    | 1228                 | 98.79              |
| Renal necrosis             | 1         | 0.08    | 1229                 | 98.87              |
| Renal papillary necrosis   | 1         | 0.08    | 1230                 | 98.95              |
| Renal tubular necrosis     | 1         | 0.08    | 1231                 | 99.03              |
| Sarcoma                    | 1         | 0.08    | 1232                 | 99.12              |

| Primary Diagnoses in Goats            |           |         |                      |                    |
|---------------------------------------|-----------|---------|----------------------|--------------------|
| Diagnosis                             | Frequency | Percent | Cumulative Frequency | Cumulative Percent |
| Synovitis                             | 1         | 0.08    | 1233                 | 99.20              |
| Thymic lymphoma                       | 1         | 0.08    | 1234                 | 99.28              |
| Urethral infarct                      | 1         | 0.08    | 1235                 | 99.36              |
| Urethral stricture                    | 1         | 0.08    | 1236                 | 99.44              |
| Urethritis                            | 1         | 0.08    | 1237                 | 99.52              |
| Urinary bladder perforation           | 1         | 0.08    | 1238                 | 99.60              |
| Uterine amyloidosis                   | 1         | 0.08    | 1239                 | 99.68              |
| Uterine carcinoma                     | 1         | 0.08    | 1240                 | 99.76              |
| Vesicopreputial anastomosis stricture | 1         | 0.08    | 1241                 | 99.84              |
| White muscle disease                  | 1         | 0.08    | 1242                 | 99.92              |
| Yew toxicity                          | 1         | 0.08    | 1243                 | 100.00             |
