# Supplementary material for: Effect of age, sex, and county on postmortem findings in goats and sheep in Tennessee (USA), 2017–2021
Source: PubMed Central journal article supplement (PMC11642948; doi:10.1371/journal.pone.0315680), 2024-12-13
Supplement: pone.0315680.s002.pdf [file pone.0315680.s002.pdf]

**S2 Table.**

| Primary Diagnoses in Sheep |           |         |                      |                    |
|----------------------------|-----------|---------|----------------------|--------------------|
| Primary Diagnosis          | Frequency | Percent | Cumulative Frequency | Cumulative Percent |
| Endoparasitism             | 182       | 32.85   | 182                  | 32.85              |
| Abortion                   | 77        | 13.90   | 259                  | 46.75              |
| No diagnosis               | 42        | 7.58    | 301                  | 54.33              |
| Pneumonia                  | 42        | 7.58    | 343                  | 61.91              |
| Neurologic disease         | 30        | 5.42    | 373                  | 67.33              |
| Trauma                     | 20        | 3.61    | 393                  | 70.94              |
| Intestinal                 | 15        | 2.71    | 408                  | 73.65              |
| Copper toxicity            | 13        | 2.35    | 421                  | 75.99              |
| Forestomach disease        | 11        | 1.99    | 432                  | 77.98              |
| Emaciation                 | 9         | 1.62    | 441                  | 79.60              |
| Sepsis                     | 9         | 1.62    | 450                  | 81.23              |
| Anemia                     | 6         | 1.08    | 456                  | 82.31              |
| Abomasal disease           | 5         | 0.90    | 461                  | 83.21              |
| Metritis                   | 5         | 0.90    | 466                  | 84.12              |
| Urolithiasis               | 5         | 0.90    | 471                  | 85.02              |
| Caseous lymphadenitis      | 4         | 0.72    | 475                  | 85.74              |
| Dermatitis                 | 4         | 0.72    | 479                  | 86.46              |
| Esophageal disease         | 4         | 0.72    | 483                  | 87.18              |
| Osteomyelitis              | 4         | 0.72    | 487                  | 87.91              |
| Dystocia                   | 3         | 0.54    | 490                  | 88.45              |
| Heart failure              | 3         | 0.54    | 493                  | 88.99              |
| Mesentery                  | 3         | 0.54    | 496                  | 89.53              |
| Nephritis                  | 3         | 0.54    | 499                  | 90.07              |
| Oral                       | 3         | 0.54    | 502                  | 90.61              |

| Primary Diagnoses in Sheep      |           |         |                      |                    |
|---------------------------------|-----------|---------|----------------------|--------------------|
| Primary Diagnosis               | Frequency | Percent | Cumulative Frequency | Cumulative Percent |
| Pulmonary edema                 | 3         | 0.54    | 505                  | 91.16              |
| Salmonellosis                   | 3         | 0.54    | 508                  | 91.70              |
| Dystocia                        | 3         | 0.54    | 511                  | 92.24              |
| BVDV                            | 2         | 0.36    | 513                  | 92.60              |
| Copper deficiency               | 2         | 0.36    | 515                  | 92.96              |
| Copper toxicosis                | 2         | 0.36    | 517                  | 93.32              |
| Hepatic abscesses               | 2         | 0.36    | 519                  | 93.68              |
| Kidney disease                  | 2         | 0.36    | 521                  | 94.04              |
| Mastitis                        | 2         | 0.36    | 523                  | 94.40              |
| Nasal adenocarcinoma            | 2         | 0.36    | 525                  | 94.77              |
| Pregnancy toxemia               | 2         | 0.36    | 527                  | 95.13              |
| Abscess                         | 1         | 0.18    | 528                  | 95.31              |
| Atlanto-occipital joint abscess | 1         | 0.18    | 529                  | 95.49              |
| Bladder                         | 1         | 0.18    | 530                  | 95.67              |
| Cellulitis                      | 1         | 0.18    | 531                  | 95.85              |
| Copper Toxicity                 | 1         | 0.18    | 532                  | 96.03              |
| Cryptorchidism                  | 1         | 0.18    | 533                  | 96.21              |
| Ectoparasitism                  | 1         | 0.18    | 534                  | 96.39              |
| Hepatic lipidosis               | 1         | 0.18    | 535                  | 96.57              |
| Hepatic necrosis                | 1         | 0.18    | 536                  | 96.75              |
| Hepatic trematodiasis           | 1         | 0.18    | 537                  | 96.93              |
| Hepatopathy                     | 1         | 0.18    | 538                  | 97.11              |
| Hydrometra                      | 1         | 0.18    | 539                  | 97.29              |
| Laryngotracheitis               | 1         | 0.18    | 540                  | 97.47              |
| Lymphoma                        | 1         | 0.18    | 541                  | 97.65              |

| Primary Diagnoses in Sheep |           |         |                      |                    |
|----------------------------|-----------|---------|----------------------|--------------------|
| Primary Diagnosis          | Frequency | Percent | Cumulative Frequency | Cumulative Percent |
| Mammary gland abscess      | 1         | 0.18    | 542                  | 97.83              |
| Nasal fistula              | 1         | 0.18    | 543                  | 98.01              |
| Osteoarthritis             | 1         | 0.18    | 544                  | 98.19              |
| Otitis media               | 1         | 0.18    | 545                  | 98.38              |
| Peritonitis                | 1         | 0.18    | 546                  | 98.56              |
| Pleuritis                  | 1         | 0.18    | 547                  | 98.74              |
| Pregnancy Toxemia          | 1         | 0.18    | 548                  | 98.92              |
| Pulmonary dysmaturity      | 1         | 0.18    | 549                  | 99.10              |
| Renal Failure              | 1         | 0.18    | 550                  | 99.28              |
| Rhinitis                   | 1         | 0.18    | 551                  | 99.46              |
| Skeletal muscle necrosis   | 1         | 0.18    | 552                  | 99.64              |
| Thymoma                    | 1         | 0.18    | 553                  | 99.82              |
| White muscle disease       | 1         | 0.18    | 554                  | 100.00             |
